# Supplementary material for: Sister DNA Entrapment between Juxtaposed Smc Heads and Kleisin of the Cohesin Complex
Source: PubMed Central journal article supplement (PMC6675936; doi:10.1016/j.molcel.2019.05.023), 2019-07-25

**Molecular Cell, Volume 75**

**Supplemental Information**

**Sister DNA Entrapment between Juxtaposed Smc**

**Heads and Kleisin of the Cohesin Complex**

**Christophe Chopard, Robert Jones, Till van Oepen, Johanna C. Scheinost, and Kim Nasmyth**

## SupplementanFigures:

### Figure S1. Related to Figure 1 and 2

(A) Multiple sequence alignment indicating the lack of conservation of Smc residues which were mutated to cysteines.

(B) Cells containing indicated cysteine residues were grown in YPD at different temperatures (25°C, 30°C and 37°C). Coiled coils, E and J heads cysteine pairs do not rescue lethality of *eco1(G211H)* temperature sensitive mutant at 37°C.

(C) In vivo cysteine cross-linking of Smc1(N1192C)-HA6 and Smc3(R1222C)-PK6 proteins depends on both cysteine residues and BMOE. Crosslinking reaction was performed in vivo with BMOE. Cell protein extracts were separated by SDS-PAGE and analysed by western blot.

(D) In vivo cysteine cross-linking of Smc1(S161C)-HA6 and Smc3(K160C)-PK6 proteins depends on both cysteine residues and BMOE. Crosslinking reaction was performed in vivo with BMOE. Cell protein extracts were separated by SDS-PAGE and analysed by western blot.

(E) In vivo cysteine cross-linking of Smc1(K201C)-myc9 and Smc3(K198C)-PK6 proteins depends on both cysteine residues and BMOE. Crosslinking reaction was performed in vivo with BMOE. Cell protein extracts were separated by SDS-PAGE and analysed by western blot.

### Figure S2. Related to Figure 3 and 4

(A) Smc1(K639C)-HA6 and Smc3(E570C, 968/969flagTEVx3)-PK6 or Smc1(K639C, N1192C)-HA6 and Smc3(E570C, 968/969flagTEVx3, R1222C)-PK6 proteins containing hinge and/or E heads cysteine pairs were cross-linked in vivo using BMOE. Complexes were immunoprecipitated on Smc3-PK6, cut by recombinant Tev protease, separated by SDS-PAGE and western blot. Note that on a western-blot, hinge-E-head double 4C cross-link is masked by hinge single 2C cross-link. Engineered TEV cleavage of Smc3 reveals the double crosslinking.

(B) Smc1 and Smc3-HaloTag proteins containing E heads, alternative J heads and/or coiled coils cysteine pairs were cross-linked in vivo with BMOE. Complexes were immunoprecipitated on Scc1-PK6, labelled with TMR ligand, separated by SDS-PAGE and quantified using in-gel fluorescence. Percentage of cross-link efficiency is given. Asterisk shows the location of the double crosslink.

(C) Smc1 and Smc3-HaloTag proteins containing E heads, J heads and/or coiled coils cysteine pairs were analyzed as in (B).

(D) Left panel: Smc1-HA, Smc3 and Scc1-PK proteins containing hinge and/or J heads cysteine pairs were crosslinked in vivo, immunoprecipitated on Scc1-PK6, separated by SDS-PAGE and analysed by western blot. Right panel: Smc1 and Smc3-HaloTag proteins containing hinge and/or J heads cysteine pairs were analysed as in (B). Percentage of the double cross-link efficiency is indicated in box.

(E-F) Coiled coils interactions in trimers. Smc1-HA, Smc3 and Scc1-pk6 proteins containing coiled coils cysteine pairs combined with cysteine pairs at the Smc3-Scc1 (C) or Smc1-Scc1 (D) interface

were cross-linked in vivo using BMOE. Complexes were immunoprecipitated on Scc1-PK6, separated by SDS-PAGE and semi-quantified by western blot. Percentage of cross-link efficiency is given.

### **Figure S3. Related to Figure 5**

- (A) FACS profiles for the experiment described in Figure 5A.
- (B) Strains containing the Scc1 gene under the control of the WT Scc1 or Met3-repressible promoter as described in Figure 5B were grown in synthetic media lacking methionine or YPD.
- (C) FACS profiles for the experiment described in Figure 5B.
- (D) FACS profiles for the experiment described in Figure 5C.
- (E) FACS profiles for the experiment described in Figure 5D.
- (F) FACS profiles for the experiment described in Figure 5A.
- (G) FACS profiles for the experiment described in Figure 5E.
- (H) FACS profiles for the experiment described in Figure 5F.
- (I) Strains containing Pds5-AID or Eco-AID do not grow on YPD + 5mM Auxin

### **Figure S4. Related to Figures 6 and 7**

- (A) Example of an independent repeat of the experiment shown in Figure 6A and showing CMs and CDs in exponentially growing strains containing cysteines in the hinge, E heads and/or Smc1/Sccl/Smc3 interfaces. Note that part of the blot shown in this panel is also shown in Figure 6C with a different contrast.
- (B) Example of an independent repeat of the experiment shown in Figure 6B and showing CMs and CDs in exponentially growing strains containing cysteines in the hinge, J heads and/or Smc1/Sccl/Smc3 interfaces.
- (C) Smc1-HA and Smc3 proteins containing hinge, E heads, J heads or coiled coils cysteine pairs were cross-linked in vivo using BMOE and analyzed as in Figure 7A.
- (D) FACS profiles for the experiment described in Figure 7B.
- (E) FACS profiles for the experiment described in Figure 7C.

### **Figure S5. Related to Figure 7**

- (A) Calibrated ChIP-seq profiles of Scc1-PK6 in the absence of Wpl1 and in the presence of WT Eco1 (blue) or the absence of both Wpl1 and functional Eco1 (orange). Sixteen yeast chromosomes profiles are centred on the CDEIII element.

(B) Calibrated ChIP-seq profiles of Scc1-PK6 on chromosomes I and IV in the absence of Wpl1, plus/minus functional Eco1.

**Figure S6. Related to Figure 7**

(A) Calibrated ChIP-seq profiles of Pds5-PK6 in the absence of Wpl1 and presence of WT Eco1 (blue) or the absence of both Wpl1 and functional Eco1 (orange). Sixteen yeast chromosomes profiles are centred on the CDEIII element.

(B) Calibrated ChIP-seq profiles of Pds5-PK6 on chromosomes I and IV in the absence of Wpl1, plus/minus functional Eco1.



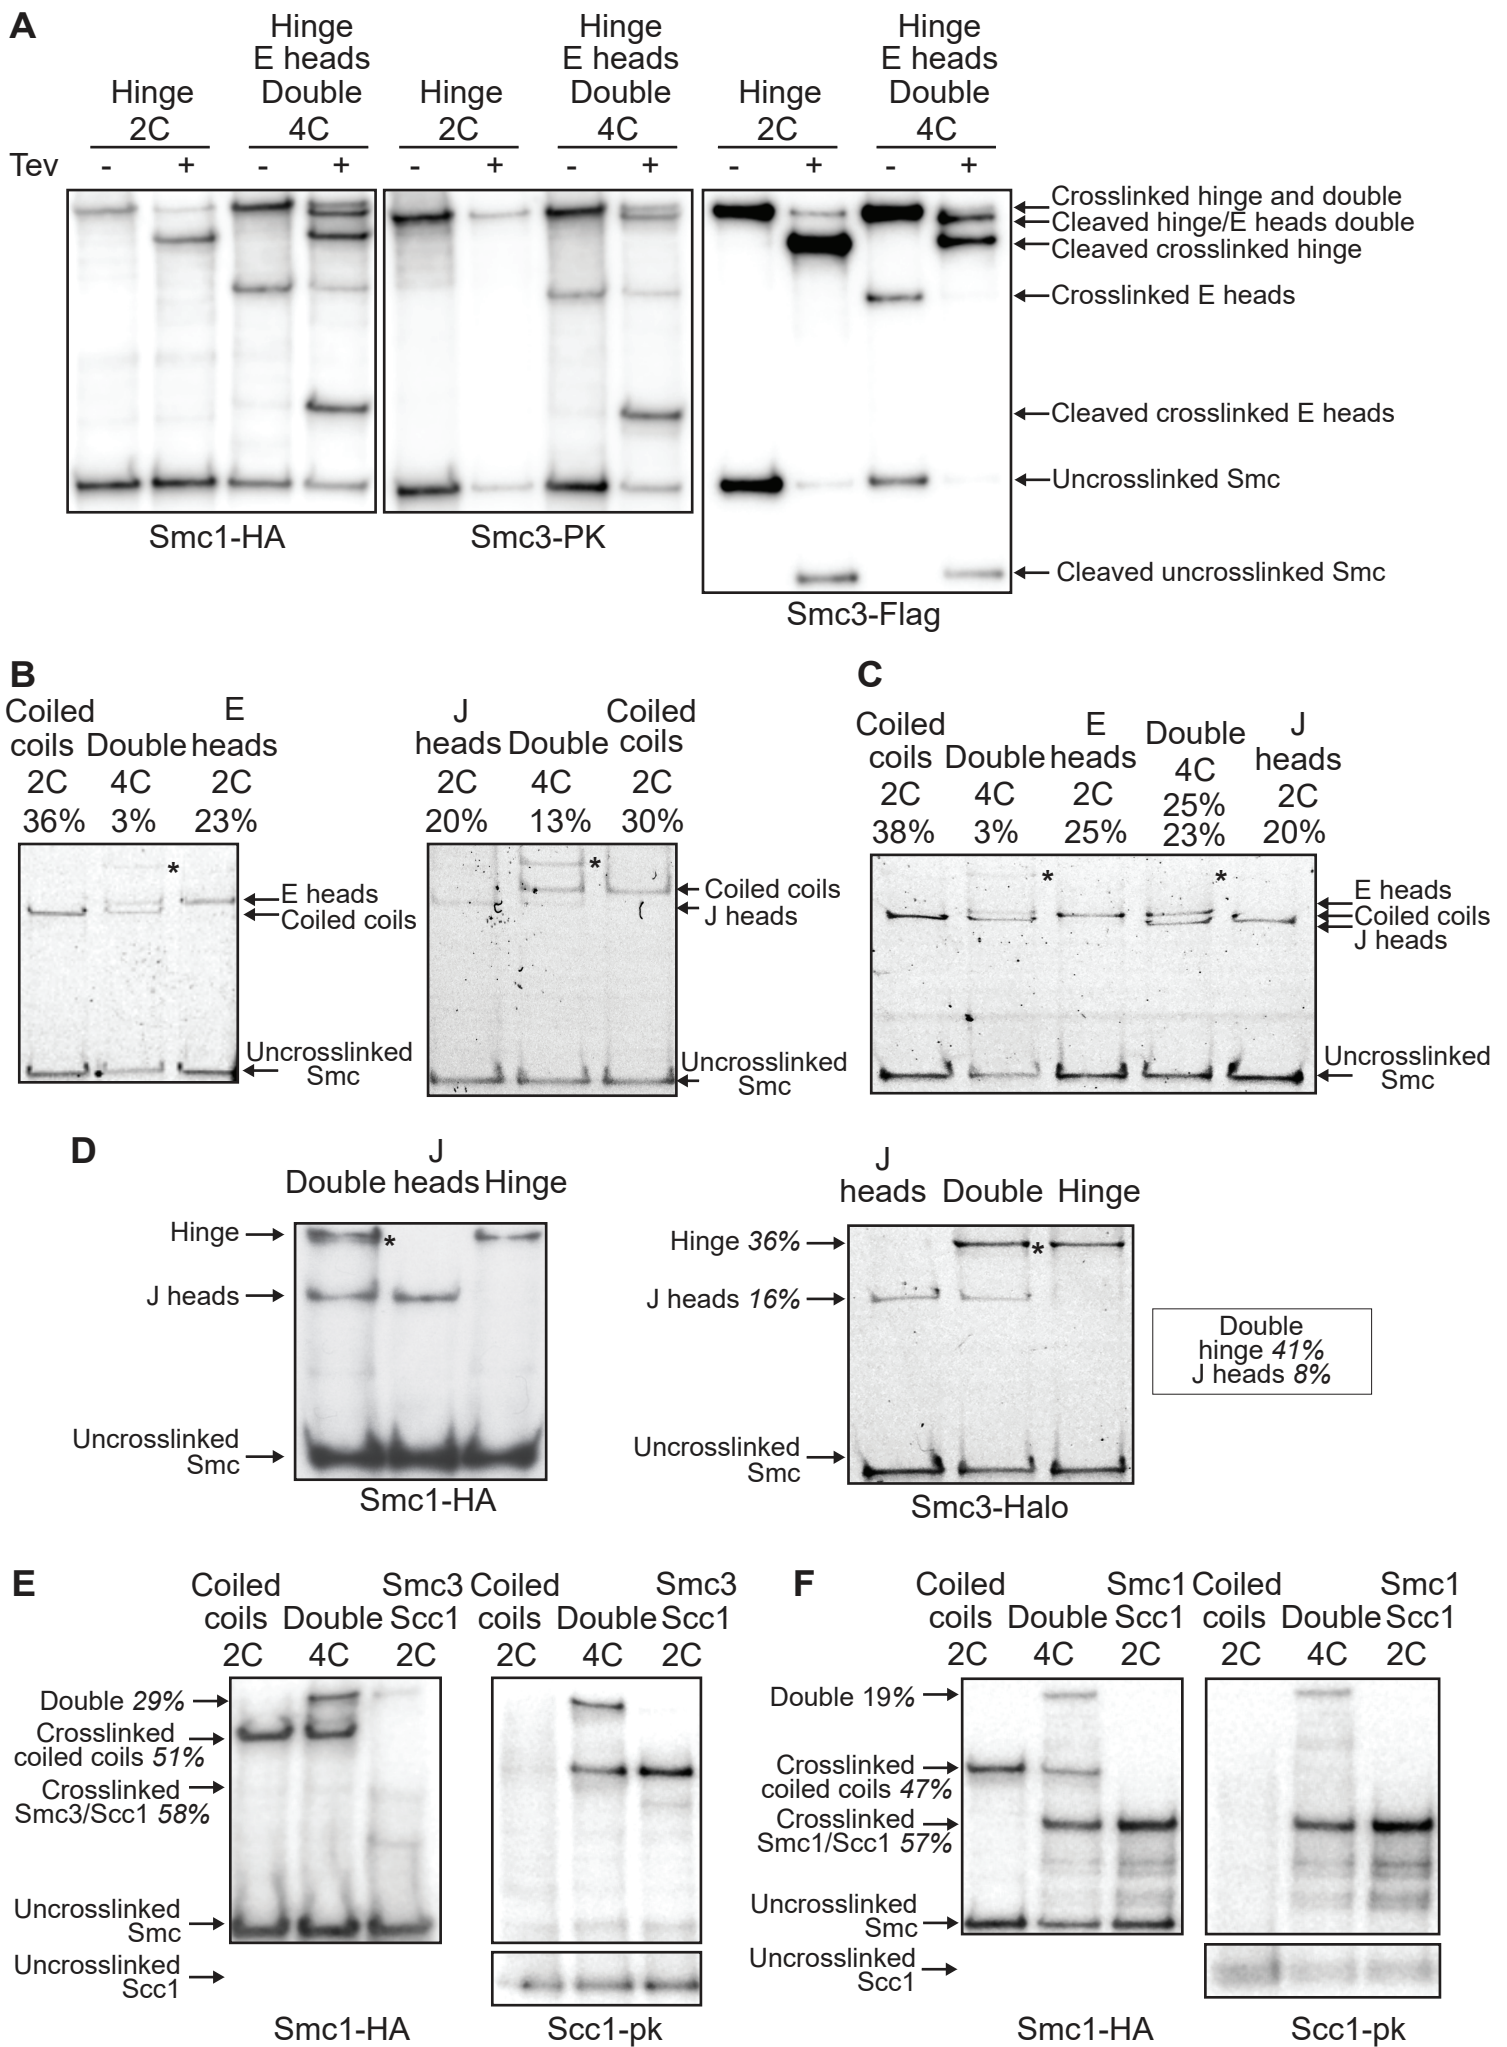

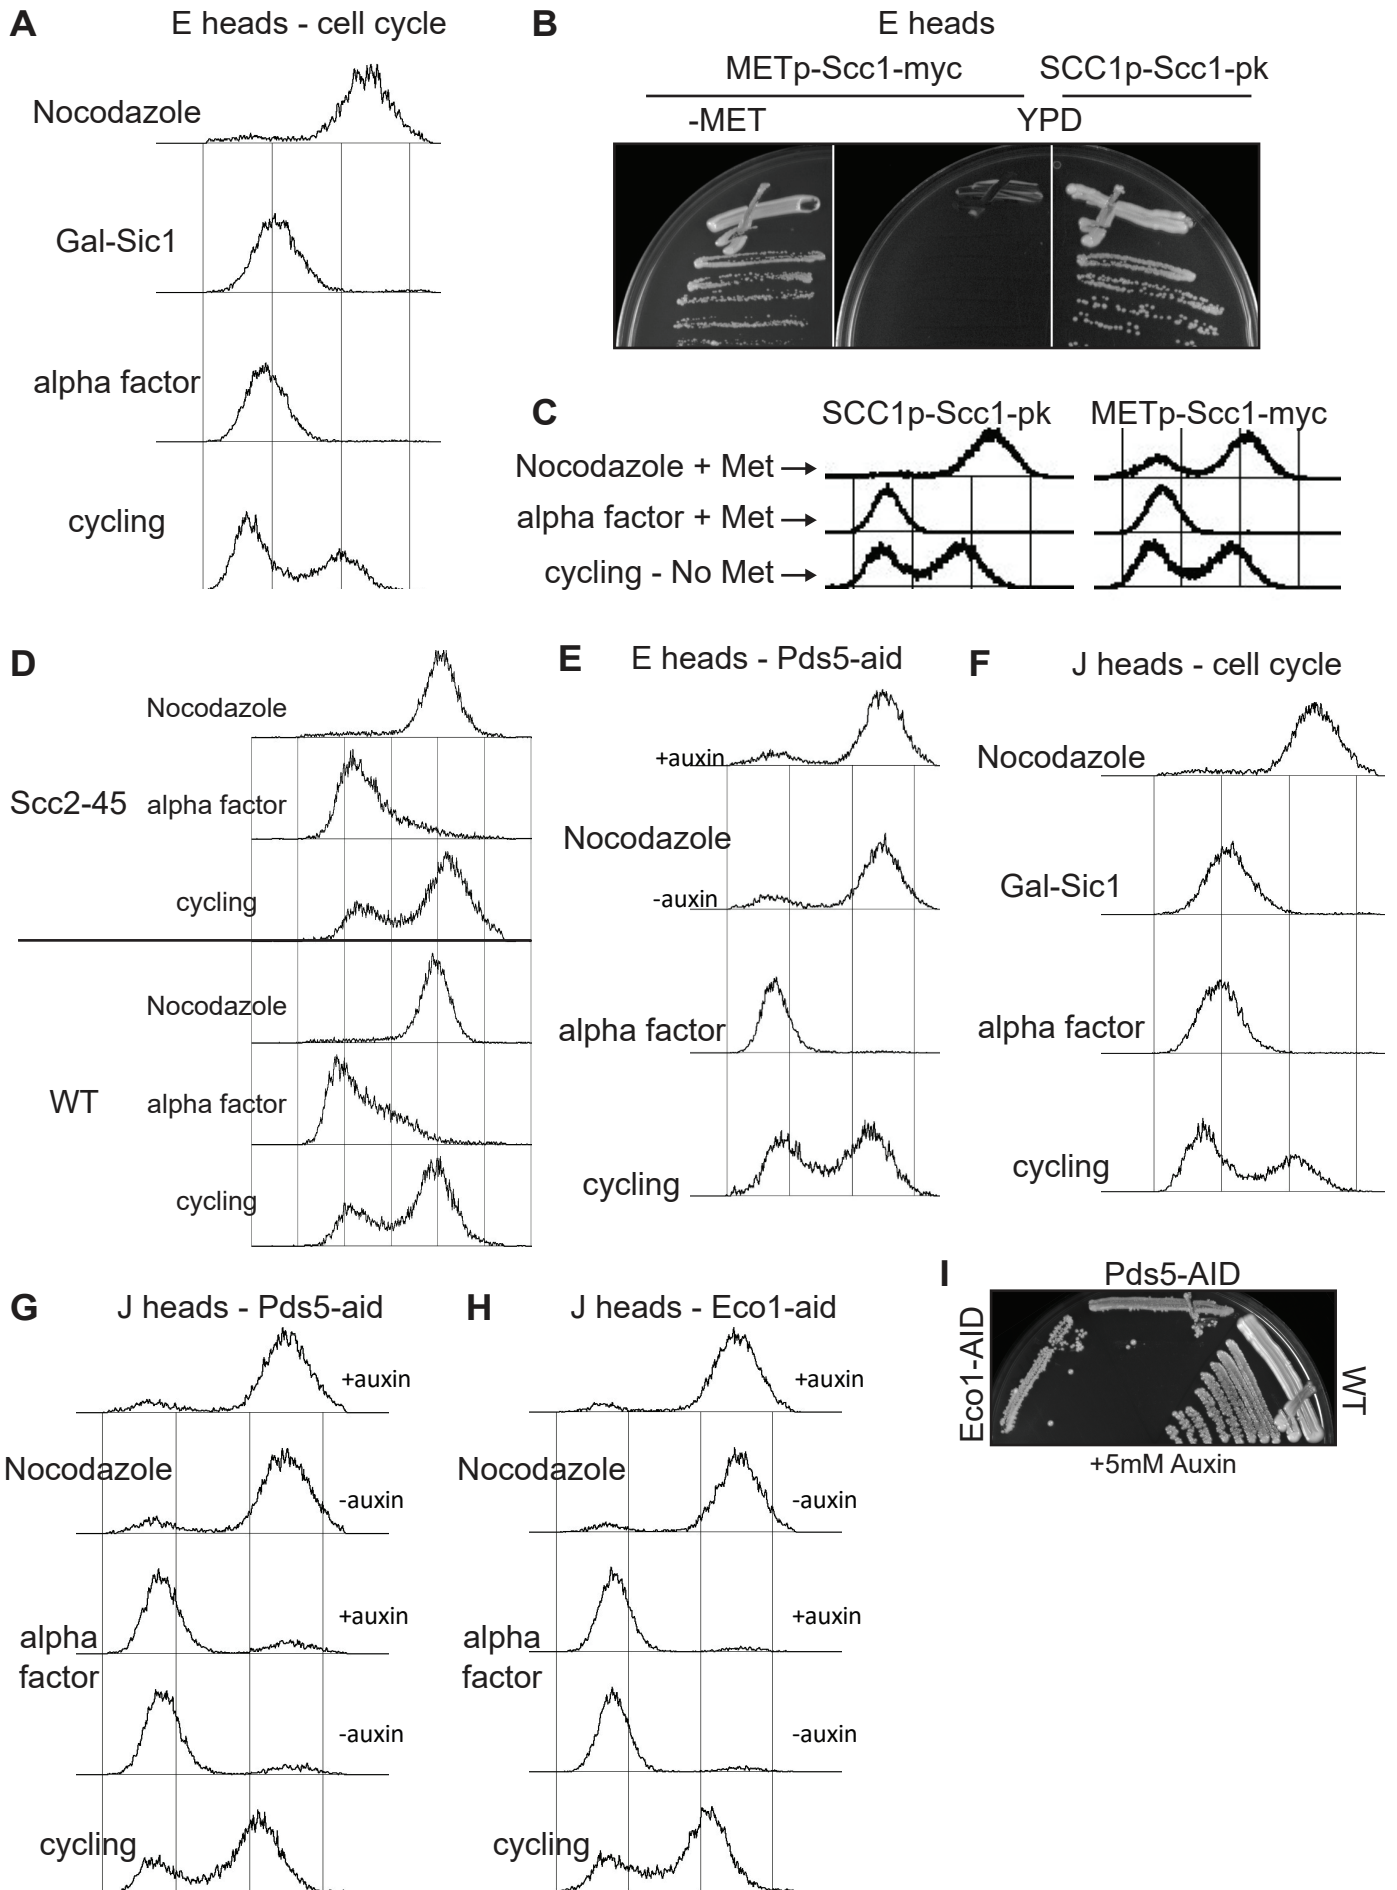

Sup. figure3

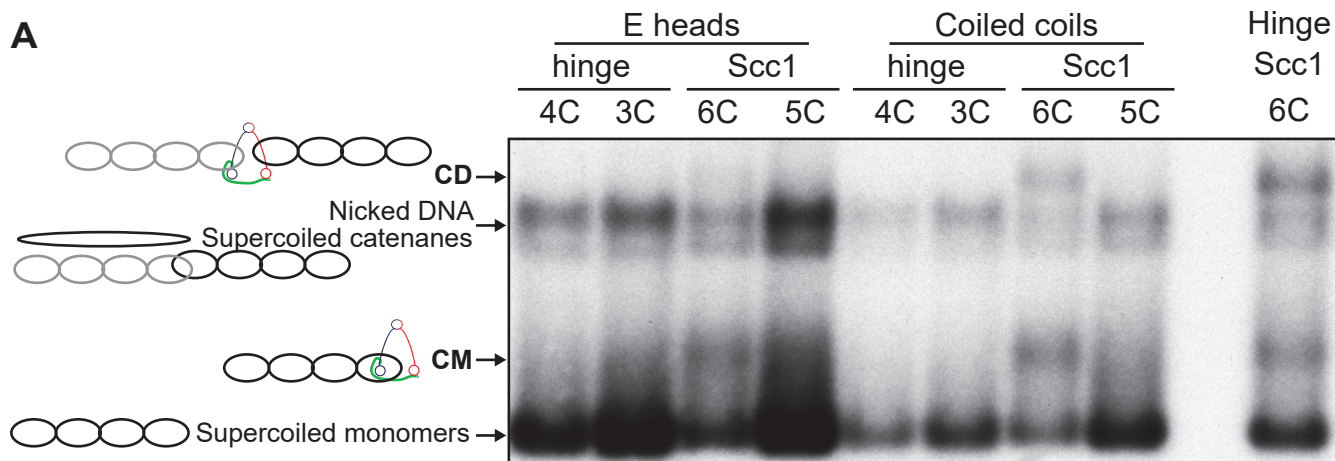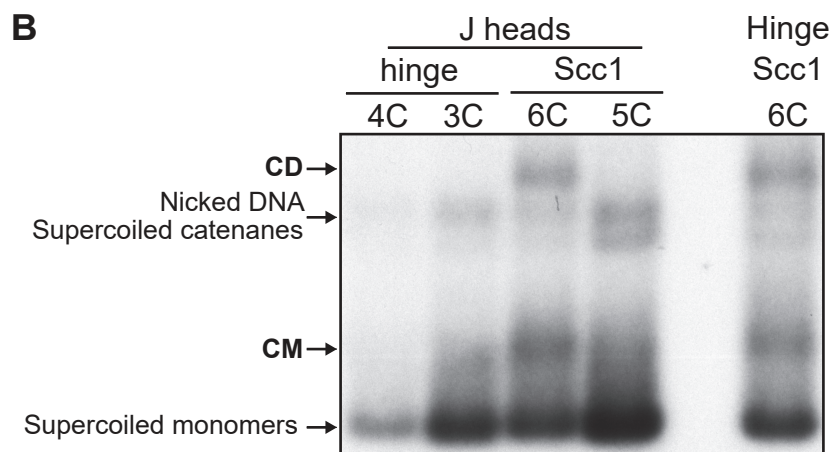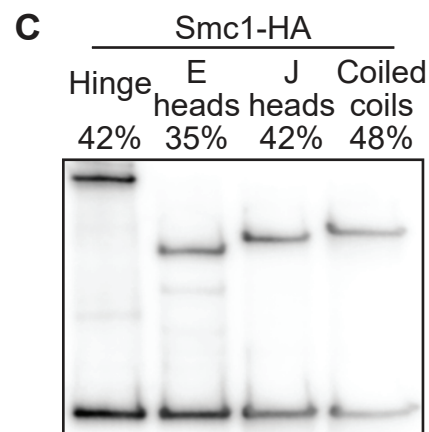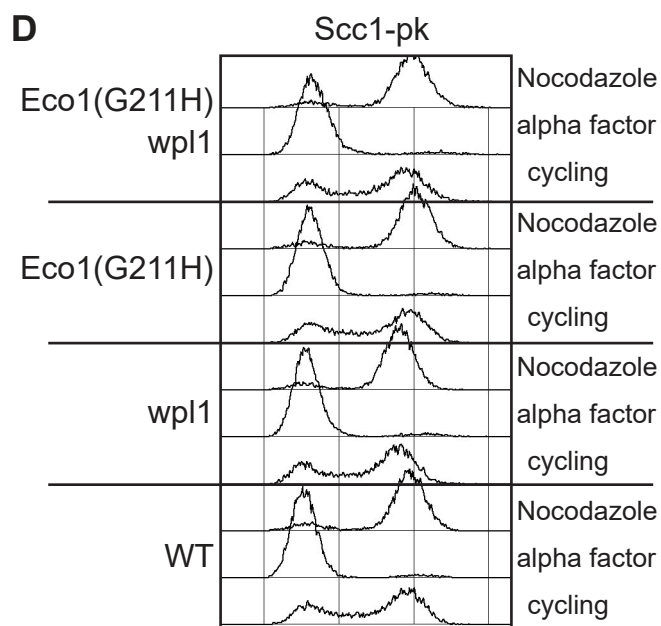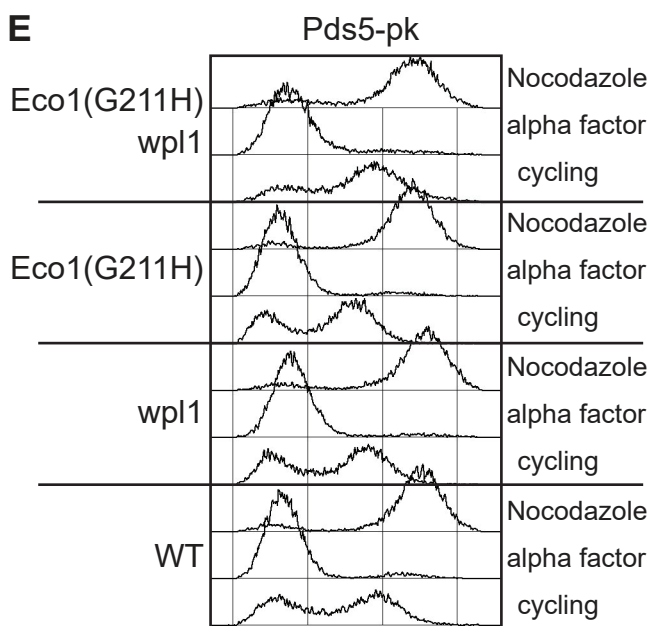



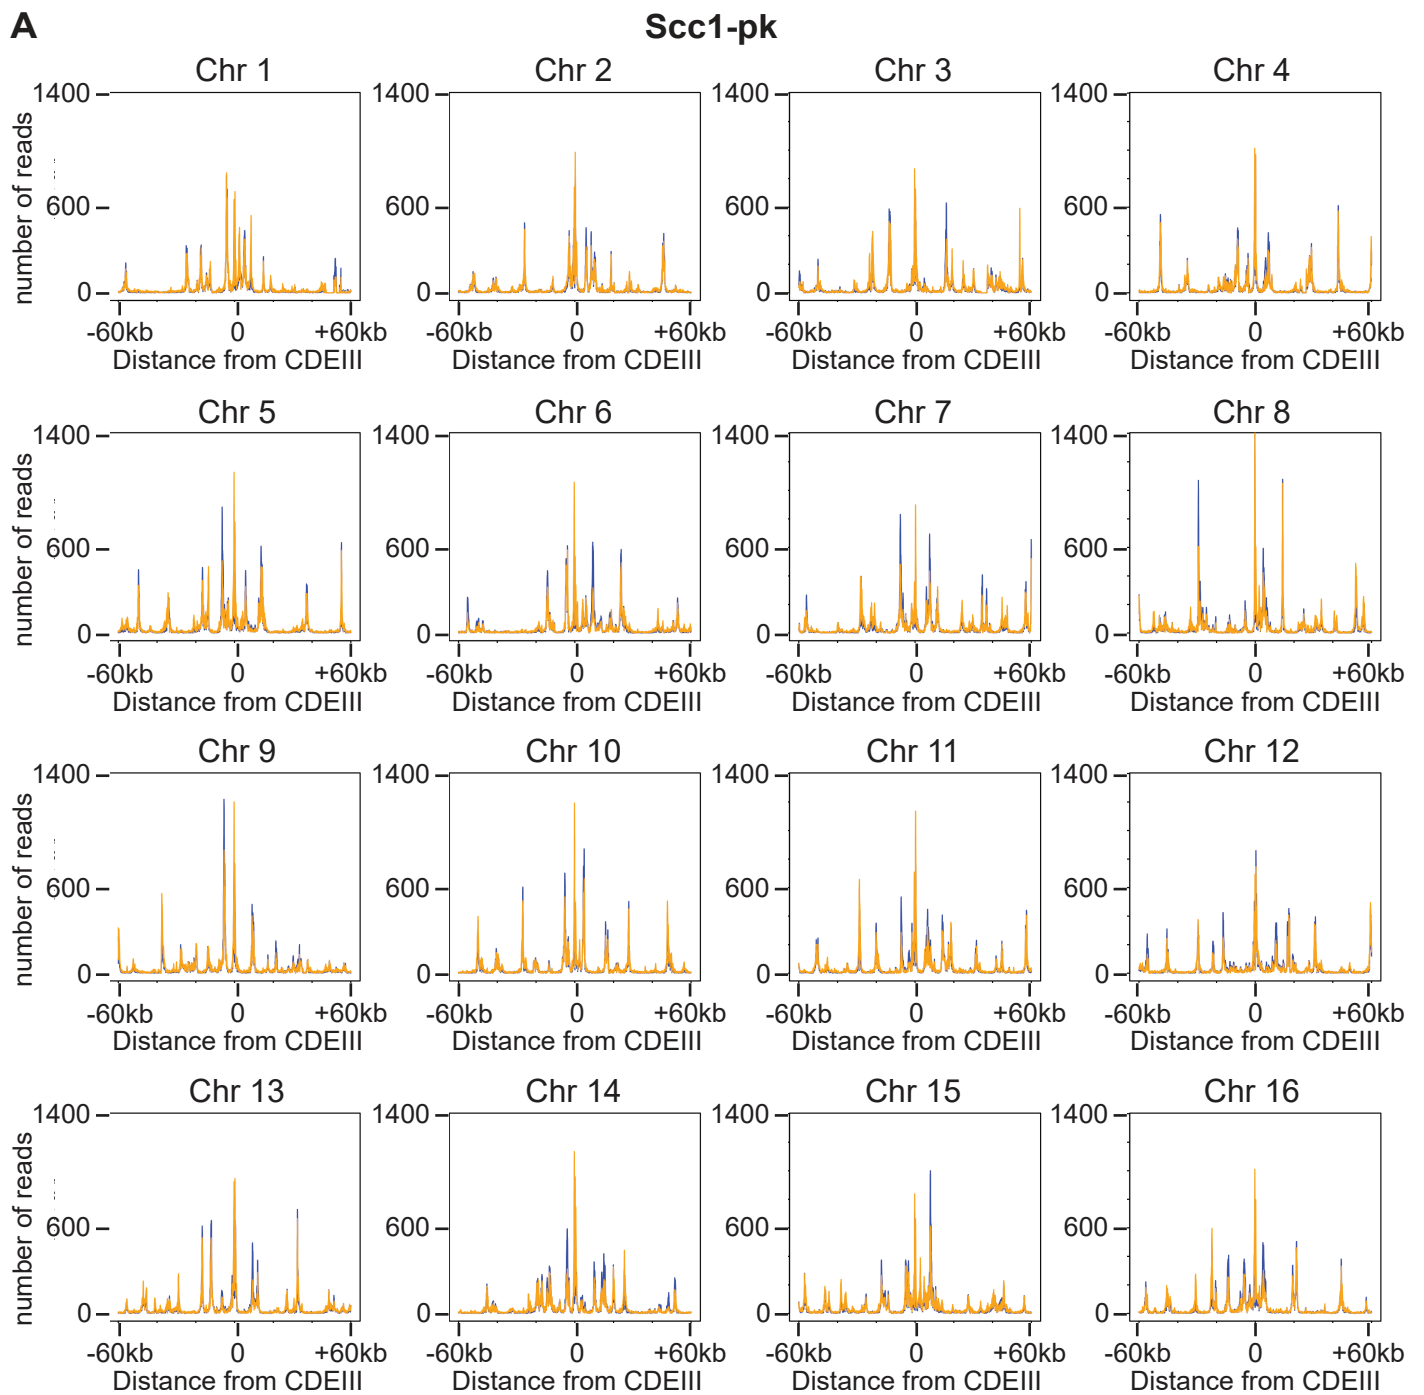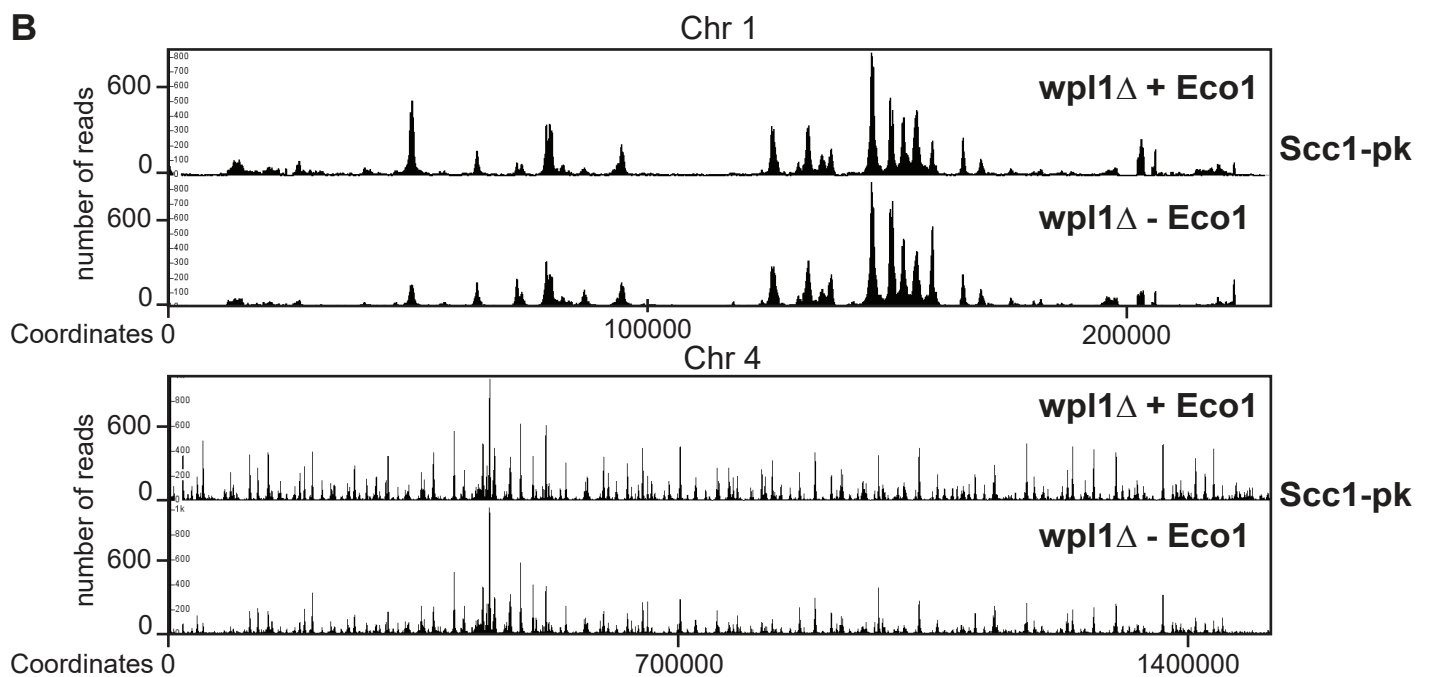

**Sup. figure 5**

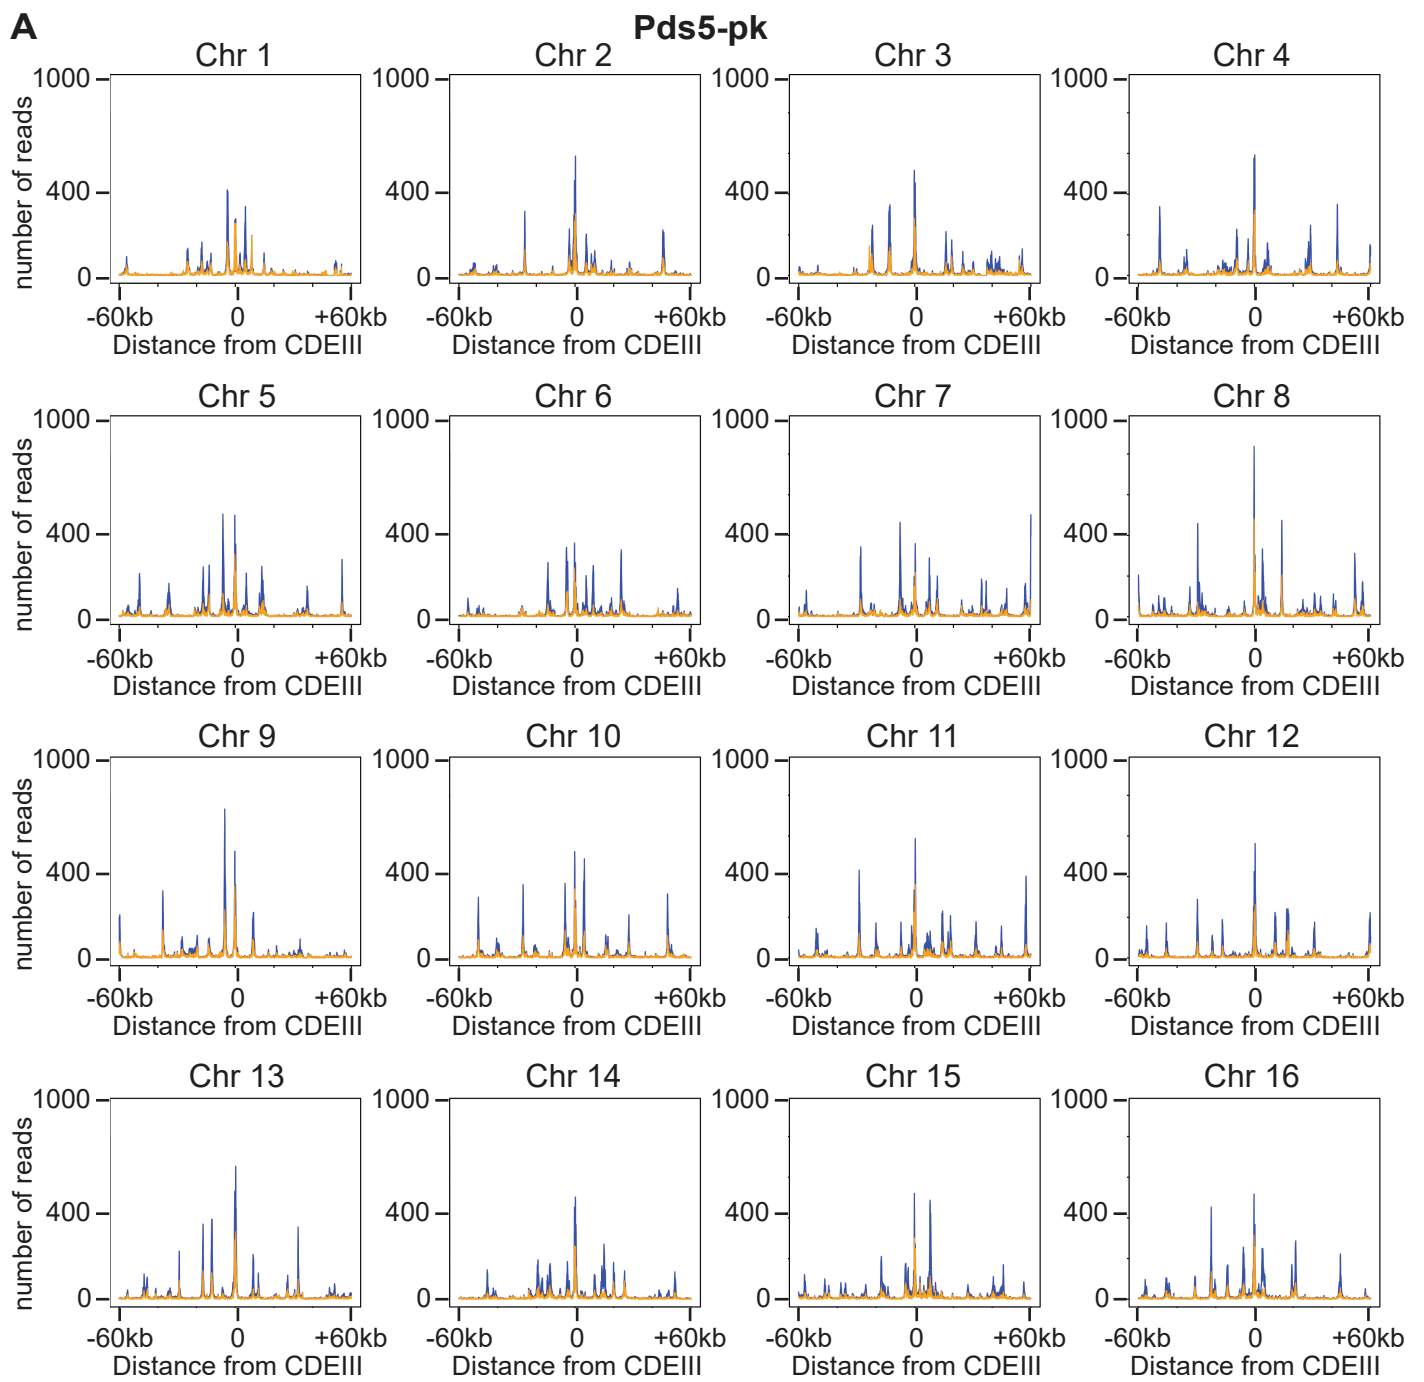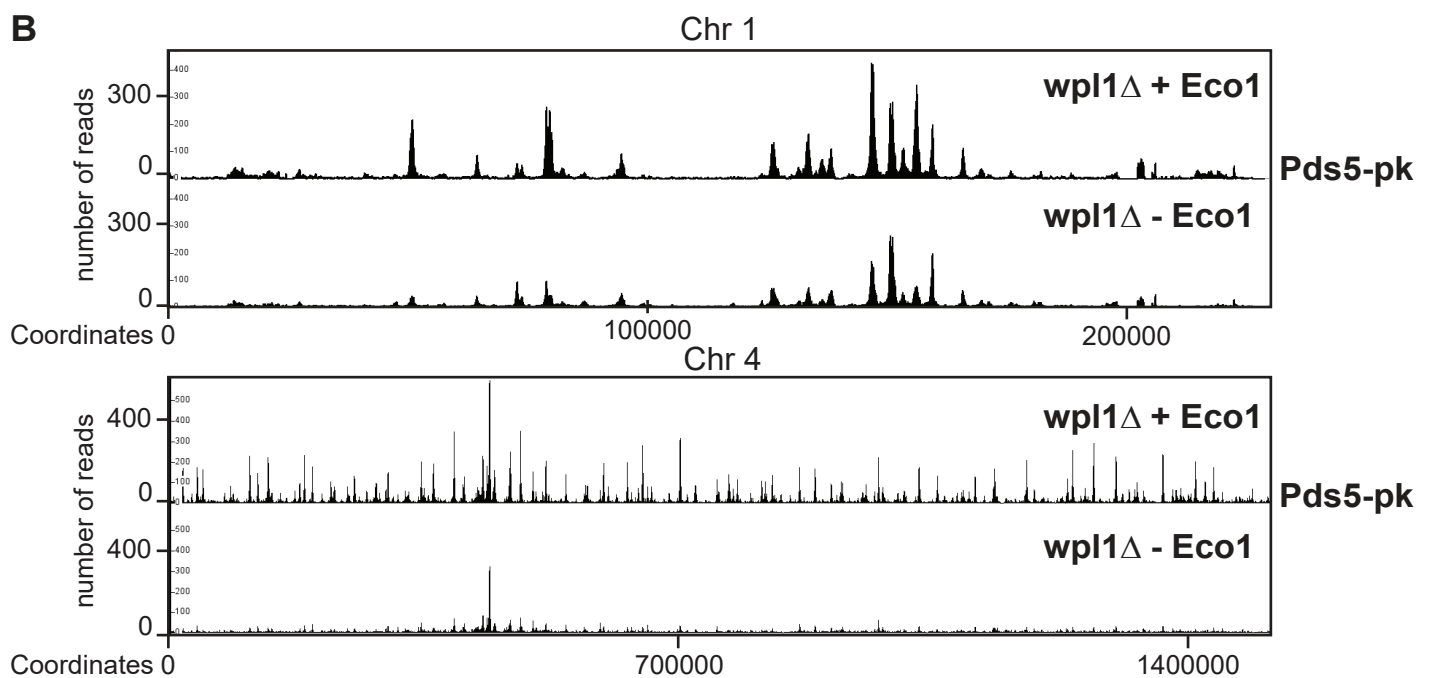

Supplement: mmc1.pdf [file mmc1.pdf]
